# Supplementary material
Source: HighWire-hosted journal article supplement (https://jnm.snmjournals.org/highwire/filestream/94204/field_highwire_adjunct_files/0/jnm076356_Supplemental_Figures.pdf)
Supplement: jnm076356_Supplemental_Figures.pdf [file jnm076356_Supplemental_Figures.pdf]

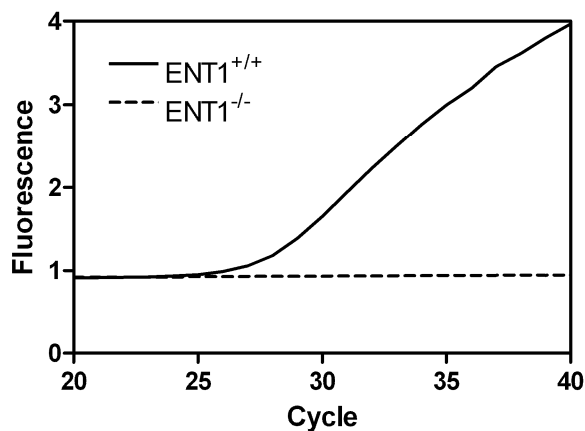

**SUPPLEMENTAL FIGURE 1.** Analysis of mENT1 transcript levels in spleens of ENT1<sup>+/+</sup> and ENT1<sup>-/-</sup> mice. mRNA was isolated from spleens of ENT1<sup>+/+</sup> and ENT1<sup>-/-</sup> mice and ENT1 transcript levels were analyzed with TaqMan real-time RT-PCR. Shown are fluorescence levels, which represent the presence of ENT1 mRNA transcripts, from individual wells from a representative experiment.

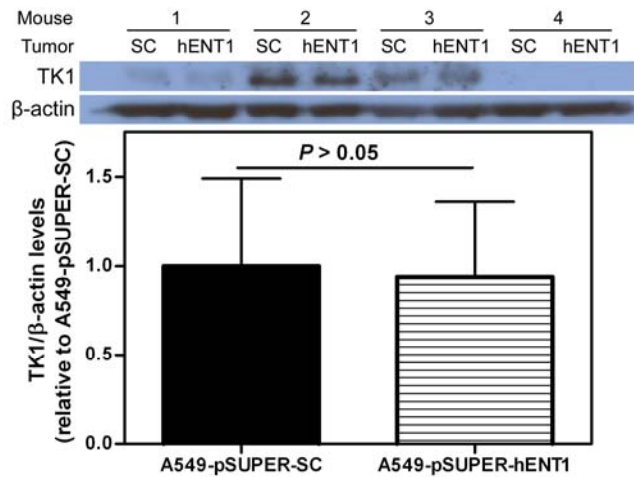

**SUPPLEMENTAL FIGURE 2.** Immunoblot of TK1 and  $\beta$ -actin in A549-derived xenograft tumors from four different mice. Average TK1/ $\beta$ -actin band intensity ratios were quantified with MetaMorph Offline software and bars represent mean  $\pm$  SEM values.
